# Supplementary material
Source: PubMed Central journal article supplement (PMC4766016)
Supplement: NIHMS750030-supplement-Legacy_Supplemental_File_3.pdf [file NIHMS750030-supplement-Legacy_Supplemental_File_3.pdf]

Acknowledgment Permission Form

Journal Stroke

Manuscript No. STROKE/2015/011889R2

First author Gupta

Title of work Silent Brain Infarction and Risk of Future Stroke: A Systematic Review and Meta-Analysis

Acknowledgment Permission:

Authors must provide written permission/approval from all individuals mentioned by name in the Acknowledgements section of a submitted manuscript. By signing this form, any and all acknowledged persons therefore state that they have read and approved the mention of their names in the Acknowledgment section of the aforementioned paper.

Printed Name B. Gwen Windham MD MHS

Signature 

Date 12-30-2015

Printed Name

Signature

Date

Printed Name

Signature

Date

Printed Name

Signature

Date
