# Supplementary material
Source: PubMed Central journal article supplement (PMC4766016)
Supplement: NIHMS750030-supplement-Online_Supplement_-_Clean.pdf [file NIHMS750030-supplement-Online_Supplement_-_Clean.pdf]

**Supplemental Material**

## Supplemental Methodology

### Literature Search Details

Ovid MEDLINE(R) In-Process & Other Non-Indexed Citations and Ovid MEDLINE(R) 1946 to Present - Search ran 04/03/2015

1. exp Brain Infarction/
2. ((brain or cerebral or circulation or covert or lacunar or subcortical or venous) adj3 infarct\*).tw.
3. 1 or 2
4. silent.tw.
5. 3 and 4
6. (SBI or SLI or SSBI).tw.
7. 5 or 6
8. exp Magnetic Resonance Imaging/
9. magnetic resonance.tw.
10. (MR or MRA or MRDTI or MRI or MRIs or NMR).tw.
11. or/8-10
12. exp stroke/
13. stroke\*.tw.
14. Cerebrovascular.tw.
15. ((brain or cerebral or isch?emic or lacunar or vascular or venous) adj2 (accident\* or attack\* or event\* or infarct\*)).tw.
16. (cva or cvas).tw.
17. or/14-16
18. 7 and 11 and 17

The English language filter was not applied. The first search was conducted in Ovid MEDLINE. Subject headings and key words were adapted for the other databases.

Supplemental Table I: Risk of Bias Questions to Assess the Quality of Included Studies

| Type of Bias      | Question                                                                                                          | Answers                                                                                                                                                                                                                                                                                                                                                                                                                                                                                                                                     |
|-------------------|-------------------------------------------------------------------------------------------------------------------|---------------------------------------------------------------------------------------------------------------------------------------------------------------------------------------------------------------------------------------------------------------------------------------------------------------------------------------------------------------------------------------------------------------------------------------------------------------------------------------------------------------------------------------------|
| Selection         | Was the study sample randomly selected or a community-dwelling population to minimize the risk of selection bias? | Yes (+) or no (-)                                                                                                                                                                                                                                                                                                                                                                                                                                                                                                                           |
|                   | Were the inclusion and exclusion criteria adequately described?                                                   | Yes (+) or no (-)                                                                                                                                                                                                                                                                                                                                                                                                                                                                                                                           |
|                   | Was the study's primary objective to assess whether SBI is predictive of clinically overt stroke?                 | Yes (+) or no (-)                                                                                                                                                                                                                                                                                                                                                                                                                                                                                                                           |
| Detection         | Was the study prospective in nature?                                                                              | Yes (+) or no (-)                                                                                                                                                                                                                                                                                                                                                                                                                                                                                                                           |
|                   | Were the investigators blinded to the clinical history of patients during ascertainment of SBI?                   | Yes (+) or no (-)                                                                                                                                                                                                                                                                                                                                                                                                                                                                                                                           |
|                   | Did more than one investigator assess for the presence of SBI?                                                    | Yes (+) or no (-)                                                                                                                                                                                                                                                                                                                                                                                                                                                                                                                           |
|                   | Were investigators blinded to SBI status when determining stroke outcomes?                                        | Yes (+) or no (-)                                                                                                                                                                                                                                                                                                                                                                                                                                                                                                                           |
| Misclassification | Did the investigators describe a method by which SBI was differentiated from dilated perivascular spaces?         | Yes (+) or no (-)                                                                                                                                                                                                                                                                                                                                                                                                                                                                                                                           |
| Reporting         | Did more than one investigator assess for stroke outcomes?                                                        | Yes (+) or no (-)                                                                                                                                                                                                                                                                                                                                                                                                                                                                                                                           |
| Attrition         | Were losses to follow up systematically recorded and reported?                                                    | Yes (+) or no (-)                                                                                                                                                                                                                                                                                                                                                                                                                                                                                                                           |
| Confounding       | Were data adjusted for covariate risk factors to minimize the risk of confounding bias?                           | Minimal (+) if studies controlled for 4 of the following 6 potential stroke risk factors which are potential confounders: age, sex, hypertension, diabetes mellitus, coronary artery disease, and smoking history and hyperlipidemia by including these variables in the multivariate model or by ensuring that patients with and without SBI were similar or matched on these variables. Relatively higher risk (-) if studies did not provide adjusted risk metric demonstrating strength of association between SBI and incident stroke. |

Note if data not provided or not specified, recorded as no (-).

Supplemental Table II. Overview of Patient Characteristics in Studies Evaluating Risk of Stroke in Patients with MRI defined Silent Brain Infarct

| Study Number | Study First Author and Year | Study Design                                               | Major Inclusion Criteria                                                                                                 | Study Name                                                       | Country                                     | Mean Follow-Up (Mo) | SBI status at baseline             | Number of Subjects | Mean Age (+/- SD) | Women, no. (% female) | Hypertension (%) | Diabetes Mellitus (%) | Chronic Kidney Disease (%) | Atrial Fibrillation (%) | Coronary Artery Disease (%) | Hyperlipidemia (%) | Smoking History (%) |
|--------------|-----------------------------|------------------------------------------------------------|--------------------------------------------------------------------------------------------------------------------------|------------------------------------------------------------------|---------------------------------------------|---------------------|------------------------------------|--------------------|-------------------|-----------------------|------------------|-----------------------|----------------------------|-------------------------|-----------------------------|--------------------|---------------------|
| 1            | Bernick 2001 <sup>1</sup>   | prospective cohort                                         | stroke-free subjects, randomly sampled, population-based cohort                                                          | Cardiovascular Health Study                                      | United States                               | 50.4                | SBI positive                       | 923                | 76*               | 543 (58.8)            | 526 (57)         | 123 (13.3)            | No data                    | 22 (2.4)                | 216 (23.4)                  | 208.4†             | 1.2‡                |
|              |                             |                                                            |                                                                                                                          |                                                                  |                                             |                     | SBI negative                       | 2401               | 73.1*             | 1437 (59.9)           | 1118 (46.6)      | 317 (13.2)            | No data                    | 65 (2.7)                | 411 (17.1)                  | 207.1†             | 0.5‡                |
| 2            | Kario 2001§ <sup>2</sup>    | prospective cohort                                         | stroke-free, ambulatory subjects with hypertension                                                                       | /                                                                | Japan                                       | 42                  | Total sample with SBI status known | 585                | 72.0 +/- 9.9      | 592 (61.8)            | 811 (84.6)       | 111 (11.6)            | No data                    | No data                 | No data                     | 187 (19.5)         | 197 (20.6)          |
| 3            | Naganuma 2005 <sup>3</sup>  | prospective cohort                                         | stroke-free, ambulatory subjects on hemodialysis                                                                         | /                                                                | Japan                                       | 40.2                | SBI positive                       | 59                 | 62.9+/-8.1        | 18(30.5)              | 51 (86.4)        | 24 (40.6)             | 59 (100)                   | No data                 | 17 (28.8)                   | 11 (18.6)          | 22 (37.2)           |
|              |                             |                                                            |                                                                                                                          |                                                                  |                                             |                     | SBI negative                       | 60                 | 49.2+/-12.8       | 17(28.3)              | 51 (85)          | 10 (16.7)             | 60 (100)                   | No data                 | 3 (5)                       | 4 (6.6)            | 8 (13.3)            |
| 4            | Bokura 2006 <sup>4</sup>    | prospective cohort                                         | stroke-free subjects, healthy volunteers                                                                                 | /                                                                | Japan                                       | 75.6                | SBI positive                       | 380                | 62 +/- 7.2        | 142 (37.4)            | 248 (65.3)       | 42 (11.1)             | No data                    | 6 (1.6)                 | No data                     | 124 (32.6)         | 142 (37.4)          |
|              |                             |                                                            |                                                                                                                          |                                                                  |                                             |                     | SBI negative                       | 2304               | 57.1 +/- 7.1      | 1069 (46.4)           | 894 (38.8)       | 221 (9.6)             | No data                    | 14 (0.6)                | No data                     | 733 (31.8)         | 740 (32.1)          |
| 5            | Debette 2010 <sup>5</sup>   | prospective cohort                                         | community-based, prospective study, offspring of original Framingham Heart Study participants                            | Framingham Offspring Cohort Study                                | United States                               | 67.2                | SBI positive                       | 253                | 65+/-9            | 126 (49.8)            | 146 (57.7)       | 40 (15.8)             | No data                    | No data                 | No data                     | No data            | 33 (13.0)           |
|              |                             |                                                            |                                                                                                                          |                                                                  |                                             |                     | SBI negative                       | 1975               | 62 +/- 9          | 923 (46.7)            | 770 (39.0)       | 215 (10.9)            | No data                    | No data                 | No data                     | No data            | 234 (12.0)          |
| 6            | Putala 2011§ <sup>6</sup>   | prospective cohort                                         | subjects with history of any ischemic stroke                                                                             | /                                                                | Finland                                     | 104.4               | Total sample with SBI status known | 655                | 40+/-8.0          | 270 (41.2)            | 244 (37.3)       | 66(10.1)              | No data                    | 19 (2.9)                | 46 (7.0)                    | 368 (56.2)         | 264 (40.3)          |
| 7            | Umemura 2011 <sup>7</sup>   | prospective cohort                                         | stroke-free, ambulatory subjects with DM                                                                                 | /                                                                | Japan                                       | 72                  | SBI positive                       | 46                 | 62.7 +/-8.1       | 102 (53.7)            | 96 (50.5)        | 46 (100)              | No data                    | No data                 | No data                     | 95 (50)            | 38 (20.0)           |
|              |                             |                                                            |                                                                                                                          |                                                                  |                                             |                     | SBI negative                       | 144                | 62.7 +/-8.1       | 102 (53.7)            | 96 (50.5)        | 144 (100)             | No data                    | No data                 | No data                     | 95 (50)            | 38 (20.0)           |
| 8            | Gioia 2012 <sup>8</sup>     | retrospective cohort                                       | subjects with history of any ischemic stroke                                                                             | /                                                                | Canada                                      | 25.7                | SBI positive                       | 48                 | 42.5+/-7.0        | 27(56.2)              | 20 (41.7)        | 10 (20.8)             | No data                    | No data                 | 6 (12.5)                    | 36 (75)            | 24 (50)             |
|              |                             |                                                            |                                                                                                                          |                                                                  |                                             |                     | SBI negative                       | 122                | 38.2+/-8.7        | 54(43.8)              | 32 (26.2)        | 12 (9.8)              | No data                    | No data                 | 5 (4.1)                     | 74 (60.7)          | 56 (45.9)           |
| 9            | Poels 2012§ <sup>9</sup>    | prospective cohort                                         | stroke-free subjects, randomly sampled, population-based cohort                                                          | The Rotterdam Scan Study                                         | Netherlands                                 | 120                 | Total sample with SBI status known | 210                | 72+/-7.4          | 522 (51.8)            | 332 (33.0)       | 66 (6.6)              | No data                    | 28 (2.8)                | 96 (9.5)                    | No data            | 176 (17.5)          |
| 10           | Weber 2012 <sup>10</sup>    | prospective cohort data from a randomized controlled trial | subjects with recent ischemic stroke within 120 days of study, SBI positive and negative patients matched by age and sex | Prevention Regimen for Effectively Avoiding Second Strokes trial | Multicenter trial (35 countries or regions) | 30                  | SBI positive                       | 207                | 66.2 +/-8.5       | 57 (27.5)             | 162 (78.2)       | 67 (32.3)             | No data                    | 8 (3.8)                 | No data                     | 99 (47.8)          | 135                 |
|              |                             |                                                            |                                                                                                                          |                                                                  |                                             |                     | SBI negative                       | 207                | 66.2 +/-8.5       | 57 (27.5)             | 155 (74.7)       | 63 (30.4)             | No data                    | 6 (2.9)                 | No data                     | 111 (53.8)         | 130                 |

|    |                                    |                    |                                                                     |                                                           |               |      |                                    |      |            |          |          |          |         |          |            |          |          |
|----|------------------------------------|--------------------|---------------------------------------------------------------------|-----------------------------------------------------------|---------------|------|------------------------------------|------|------------|----------|----------|----------|---------|----------|------------|----------|----------|
| 11 | Di Tullio 2013   , § <sup>11</sup> | prospective cohort | stroke-free subjects, population-based cohort                       | Northern Manhattan Study                                  | United States | 85.2 | Total sample with SBI status known | 1287 | 71+/-9     | 779 (61) | 934 (73) | 291 (23) | No data | 31 (2.4) | 160 (12.4) | 504 (39) | 119 (9)  |
| 12 | Miwa 2013 <sup>12</sup>            | prospective cohort | stroke-free, ambulatory subjects with >1 cardiovascular risk factor | Osaka Follow-up Study for Carotid Atherosclerosis, part 2 | Japan         | 57.6 | SBI positive                       | 130  | 68.8+/-8.6 | 237 (51) | 315(68)  | 79 (17)  | No data | No data  | No data    | 246(53)  | 70 (15)  |
|    |                                    |                    |                                                                     |                                                           |               |      | SBI negative                       | 334  | 68.8+/-8.6 | 237 (51) | 315(68)  | 79 (17)  | No data | No data  | No data    | 246(53)  | 70 (15)  |
| 13 | Windham 2015¶ <sup>13</sup>        | prospective cohort | stroke-free subjects, population-based cohort                       | The Atherosclerosis Risk in Communities Study             | United States | 174  | SBI positive                       | 220  | 64.0+/-4.5 | 134 (61) | 143 (65) | 50 (23)  | No data | No data  | 17 (8)     | No data  | 57 (26)  |
|    |                                    |                    |                                                                     |                                                           |               |      | SBI negative                       | 1611 | 62.1+/-4.5 | 972 (60) | 722 (45) | 264 (17) | No data | No data  | 82 (5)     | No data  | 277 (17) |

\* weighted median value

†Weighted median value, total cholesterol (mg/dL)

‡Weighted median value, pack-years of smoking

§cohort characteristics refer to entire patient sample as data stratified by SBI status is not available

|| Di Tullio et al. presented SBI results and stroke outcomes for a subset of those subjects enrolled in the MRI substudy of the Northern Manhattan Study. The study characteristics in this table for this study were obtained after direct correspondence with study authors who were preparing a study focused on SBI and incident stroke risk at the time of data extraction.

¶Windham et al. studied small brain lesions less than 3 mm as putative vascular lesions, in addition to lesions greater than 3 mm which were considered to be SBI. The data extracted from this study, including clinical characteristics, are focused on SBI defined>3mm versus no lesions.

Supplemental Table III: Silent Brain Infarction Definitions

| Study Number | Study First Author and Year  | Magnet Field Strength   | Section Thickness (mm) | Section Gap (mm) | Size classification | SBI MRI Signal Characteristics                                                                                                                                                                                                                                                                                                                                                              | Means of differentiating SBI from perivascular spaces                                                                                                                                                                                                                               | Means of detecting SBI in patients with documented prior stroke                                                                                                                                                                                                                                                                                 |
|--------------|------------------------------|-------------------------|------------------------|------------------|---------------------|---------------------------------------------------------------------------------------------------------------------------------------------------------------------------------------------------------------------------------------------------------------------------------------------------------------------------------------------------------------------------------------------|-------------------------------------------------------------------------------------------------------------------------------------------------------------------------------------------------------------------------------------------------------------------------------------|-------------------------------------------------------------------------------------------------------------------------------------------------------------------------------------------------------------------------------------------------------------------------------------------------------------------------------------------------|
| 1            | Bernick 2001 <sup>1</sup>    | 0.35 and 1.5 Tesla      | 5 mm                   | 0                | 3 mm or greater     | brighter lesions on spin density and T2 sequences than normal gray matter (for cortical and deep grey matter); brighter at spin density and T1 hypointense (for white matter)                                                                                                                                                                                                               | spin density brightness used to distinguish SBI from perivascular spaces                                                                                                                                                                                                            | NA                                                                                                                                                                                                                                                                                                                                              |
| 2            | Kario 2001 <sup>2</sup>      | 1.5 Tesla               | 7.8 to 8.0 mm          | not specified    | 3 to 15 mm          | low signal intensity area on T1-weighted images that was also visible as a hyperintense lesion on T2-weighted images                                                                                                                                                                                                                                                                        | not specified                                                                                                                                                                                                                                                                       | NA                                                                                                                                                                                                                                                                                                                                              |
| 3            | Naganuma 2005 <sup>3</sup>   | 1.5 Tesla               | 10 mm                  | not specified    | >3 mm               | focal area on both T1 and T2-weighted images that was visible as low-intensity areas on T1 weighted image and as high signal intensity area on T2 weighted images.                                                                                                                                                                                                                          | not specified                                                                                                                                                                                                                                                                       | NA                                                                                                                                                                                                                                                                                                                                              |
| 4            | Bokura 2006 <sup>4</sup>     | 0.15, 0.2 and 1.5 Tesla | 10 mm, 7 mm            | not specified    | >3 mm               | focal hyperintensity lesion on T2WI corresponding to a hypointensity lesion on T1WI                                                                                                                                                                                                                                                                                                         | proton density weighted or FLAIR images used to distinguish infarcts from dilated perivascular spaces                                                                                                                                                                               | NA                                                                                                                                                                                                                                                                                                                                              |
| 5            | Debette 2010 <sup>5</sup>    | 1 or 1.5 Tesla          | 4 mm                   | not specified    | >3 mm               | area of abnormal signal intensity in a vascular distribution, at least 3 mm in size with a cerebrospinal fluid density on the subtraction image and, for lesions in the basal ganglia area, distinct separation from the circle of Willis vessels                                                                                                                                           | size, location, shape, and tissue contrast to distinguish SBI from dilated perivascular spaces                                                                                                                                                                                      | NA                                                                                                                                                                                                                                                                                                                                              |
| 6            | Putala 2011 <sup>6</sup>     | 1.0 to 1.5 Tesla        | not specified          | not specified    | ≥ 3 mm              | focal hyperintensity on T2-weighted images without a corresponding history of neurologic symptoms or signs                                                                                                                                                                                                                                                                                  | simultaneous hyperintensity on T2-weighted images and hypointensity on FLAIR images for perivascular spaces as opposed to SBI                                                                                                                                                       | MRI of the brain studies acquired at the initial presentation for acute ischemic stroke were reinterpreted by study stroke neurologists and a senior neuroradiologist. SBI classification required appropriate imaging criteria as well as no corresponding history of neurologic symptoms or signs.                                            |
| 7            | Umemura 2011 <sup>7</sup>    | 1.5 Tesla               | 5 mm                   | 2 mm             | >3 mm               | areas of focal hyperintensity larger than 3 mm in diameter detected on T2-weighted images, hypointensity areas on T1-weighted images and areas of hypointensity surrounded by hyperintense rim on FLAIR images.                                                                                                                                                                             | lesions less than 3 mm in diameter or with a signal intensity similar to that of cerebrospinal fluid on FLAIR images excluded because of the high possibility of enlarged perivascular spaces, even if hyperintensity on T2-weighted images and hypointensity on T1-weighted images | NA                                                                                                                                                                                                                                                                                                                                              |
| 8            | Gioia 2012 <sup>8</sup>      | 1.5 T or 3 Tesla        | not specified          | not specified    | ≥ 3 mm              | focal hyperintensities on T2-weighted and FLAIR-weighted sequences, 3 mm in diameter, without corresponding neurologic symptoms; leukoaraiosis defined as multifocal or confluent hyperintensities located in periventricular or subcortical regions or in the pontine white matter on T2-weighted or FLAIR sequences. Differentiated from SBIs based on lesion morphology and localization | hyperintensity of T2-FLAIR images used to distinguish SBI from dilated perivascular space                                                                                                                                                                                           | SBI determined on imaging performed during the patient's initial workup for acute ischemic stroke; consensus of 2 neurologists needed to establish a lesion as an asymptomatic brain infarction using all available clinical data                                                                                                               |
| 9            | Poels 2012 <sup>9</sup>      | 1.5 Tesla               | 5 or 6 mm              | 1 or 2 mm        | at least 3 mm       | evidence of one or more infarcts on MRI, without a history of (corresponding) stroke or TIA (focal hyperintensities on T2 weighted images); white matter lesions (rather than SBIs) were considered to be present if hyperintensities were visible on proton-density and T2-weighted images, without prominent hypointensities on T1-weighted scans                                         | proton density scans were used to distinguish infarcts from dilated perivascular spaces                                                                                                                                                                                             | NA                                                                                                                                                                                                                                                                                                                                              |
| 10           | Weber 2012 <sup>10</sup>     | Not specified           | not specified          | not specified    | ≥ 3 mm              | focal hyperintense lesion on T2-weighted images and/or fluid-attenuated inversion recovery with no corresponding symptoms in the clinical history of the patient that could be attributed to the lesion; SBI were distinguished from nonspecific subcortical and periventricular white matter lesions by the presence of a corresponding hypointense lesion on T1-weighted images           | hyperintensity of T2-FLAIR images used to distinguish SBI from dilated perivascular space                                                                                                                                                                                           | Two study investigators defined SBI on the baseline imaging performed for acute ischemic stroke as chronic lesions with no corresponding symptoms in the clinical history of the patient that could be attributed the presumed SBI. Information about symptoms of the qualifying ischemic stroke was collected using baseline case report forms |
| 11           | Di Tullio 2013 <sup>11</sup> | 1.5 Tesla               | FLAIR=3 mm; T1=1.3 mm  | 0 mm             | ≥ 3 mm              | (1) CSF density on the subtraction image and (2) if the stroke was in the basal ganglia area, distinct separation from the circle of Willis vessels and perivascular spaces.                                                                                                                                                                                                                | lesion morphology used to distinguish SBI from perivascular spaces                                                                                                                                                                                                                  | NA                                                                                                                                                                                                                                                                                                                                              |
| 12           | Miwa 2013 <sup>12</sup>      | Not specified           | Not specified          | not specified    | >3 and <15 mm       | hypointense lesion and hyperintense rim on FLAIR images when located supratentorially, according to the corresponding hyperintensity and hypointensity on T2- and T1-weighted images, respectively, without stroke history.                                                                                                                                                                 | hyperintensity of T2-FLAIR images used to distinguish SBI from dilated perivascular space                                                                                                                                                                                           | NA                                                                                                                                                                                                                                                                                                                                              |
| 13           | Windham 2015 <sup>13</sup>   | 1.5 Tesla               | 5 mm                   | 0                | ≥ 3 mm              | lesions 3 mm in size and visible on both T1- and proton-density/T2-weighted images were classified as infarcts; an additional analysis was performed on putative vascular lesions <3 mm which were too small to definitely characterize as SBI                                                                                                                                              | spin density brightness used to distinguish SBI from perivascular spaces                                                                                                                                                                                                            | NA                                                                                                                                                                                                                                                                                                                                              |

MRI = magnetic resonance imaging; SBI = silent brain infarction; FLAIR = fluid attenuated inversion recovery; NA = not applicable

Supplemental Table IV: Definitions of stroke

| Study First Author and Year  | Ischemic Stroke Definition                                                                                                                                                                                                                                                                                              | Hemorrhagic Stroke Definition                                                                                                                                                                                                                                                                                                                                     | Stroke Outcome Adjudication Process                                                                                                                                                                                                                                                                                                               |
|------------------------------|-------------------------------------------------------------------------------------------------------------------------------------------------------------------------------------------------------------------------------------------------------------------------------------------------------------------------|-------------------------------------------------------------------------------------------------------------------------------------------------------------------------------------------------------------------------------------------------------------------------------------------------------------------------------------------------------------------|---------------------------------------------------------------------------------------------------------------------------------------------------------------------------------------------------------------------------------------------------------------------------------------------------------------------------------------------------|
| Bernick 2001 <sup>1</sup>    | clinical event of rapid onset consisting of neurological deficit lasting more than 24 hours or if less than 24 hours, associated with an appropriate brain lesion not due to hemorrhage                                                                                                                                 | clinical event of rapid onset consisting of neurological deficit lasting more than 24 hours or if less than 24 hours, with evidence of blood in the subarachnoid space, ventricles, or brain parenchyma                                                                                                                                                           | follow up yearly examinations and at interim 6 months phone contacts; additional review from all non stroke hospitalizations for ICD codes 403 through 438 identifying cerebrovascular disease; events adjudicated by stroke adjudication committee made up of study neurologists, neuroradiologist, and a clinician from the Coordinating Center |
| Kario 2001 <sup>2</sup>      | evidence of brain infarction or embolism with neurological deficit lasting more than 24 hours                                                                                                                                                                                                                           | parenchymal or subarachnoid hemorrhage at brain imaging                                                                                                                                                                                                                                                                                                           | intermittent review of medical records and telephone interviews confirmed by physician caring for the patient at the time of the event                                                                                                                                                                                                            |
| Naganuma 2005 <sup>3</sup>   | standard clinical criteria, not further specified                                                                                                                                                                                                                                                                       | standard clinical criteria, not further specified                                                                                                                                                                                                                                                                                                                 | review of medical records with diagnosis made by attending physician blinded to study purpose; family telephone interview in events that happened out of hospital                                                                                                                                                                                 |
| Bokura 2006 <sup>4</sup>     | not specified                                                                                                                                                                                                                                                                                                           | not specified                                                                                                                                                                                                                                                                                                                                                     | annual questionnaire sent to the patient's home and, if needed, telephone interview and interview of attending physician                                                                                                                                                                                                                          |
| Debette 2010 <sup>5</sup>    | acute-onset focal neurological deficit of presumed vascular etiology lasting $\geq$ 24 hours with imaging showing no hemorrhage and an infarct correlating with the clinical deficit, or an infarct documented at autopsy                                                                                               | acute-onset focal neurological deficit of presumed vascular etiology lasting $\geq$ 24 hours with imaging showing intracranial hemorrhage                                                                                                                                                                                                                         | panel adjudication of Framingham investigators reviewing all relevant medical records and clinical data                                                                                                                                                                                                                                           |
| Putala 2011 <sup>6</sup>     | an episode of focal neurologic deficits with acute onset and lasting more than 24 hours or if lasting less than 24 hours, with imaging evidence of stroke corresponding with current symptoms plus corresponding ischemic lesion on MRI                                                                                 | not specified                                                                                                                                                                                                                                                                                                                                                     | telephone interview or letter sent to the patient and all patient records available from hospitals and primary care; outcome events were classified by study stroke neurologists blinded to other clinical data with consensus agreement                                                                                                          |
| Umemura 2011 <sup>7</sup>    | not specified                                                                                                                                                                                                                                                                                                           | not specified                                                                                                                                                                                                                                                                                                                                                     | not specified                                                                                                                                                                                                                                                                                                                                     |
| Gioia 2012 <sup>8</sup>      | sudden onset of a persistent neurologic deficit or a transient neurologic deficit associated with a new infarct on brain imaging                                                                                                                                                                                        | not specified, obtained from database and chart review                                                                                                                                                                                                                                                                                                            | patient follow-up was performed by outpatient hospital visits with stroke neurologists; clinical outcomes were obtained from the database and confirmed by retrospective chart review                                                                                                                                                             |
| Poels 2012 <sup>9</sup>      | rapidly developing clinical signs of focal disturbance of cerebral function with no apparent cause other than a vascular origin, with a duration of more than 24 hours                                                                                                                                                  | not specified                                                                                                                                                                                                                                                                                                                                                     | review of medical records of all participants at the general practitioner's office and additional information from hospital records and municipal health authorities; to verify all diagnoses, investigators discussed information on all potential strokes and TIA with an experienced stroke neurologist                                        |
| Weber 2012 <sup>10</sup>     | focal neurological deficit of vascular origin lasting more than 24 h, or where there is evidence of a new brain infarct upon brain imaging; brain imaging must rule out hemorrhagic stroke, but it does not need to confirm the presence of a brain infarct if clinical symptomatology is sufficient to diagnose stroke | not studied                                                                                                                                                                                                                                                                                                                                                       | all strokes are reviewed by at least 2 Prevention Regimen for Effectively Avoiding Second Strokes Trial study adjudicators                                                                                                                                                                                                                        |
| Di Tullio 2013 <sup>11</sup> | stroke defined by Trial of Org 10172 in Acute Stroke Treatment criteria. Diagnosis of ischemic stroke was determined by two neurologists independently, and Northern Manhattan Study principal investigators adjudicated disagreements                                                                                  | not studied                                                                                                                                                                                                                                                                                                                                                       | follow-up annually by telephone; any vascular event or neurological or cardiac symptoms triggered an in-person assessment; active hospital surveillance of admission and discharge codes was performed.                                                                                                                                           |
| Miwa 2013 <sup>12</sup>      | an acute disturbance of focal neurological dysfunction with symptoms lasting >24 hours (or resulting in earlier death) and thought to be a result of either cerebral infarction                                                                                                                                         | an acute disturbance of focal neurological dysfunction with symptoms lasting >24 hours (or resulting in earlier death) and thought to be a result of either cerebral hemorrhage.                                                                                                                                                                                  | outpatient periodic visits and, in case of missed appointment follow-up, telephone interview; original medical records were also reviewed to determine the occurrence of stroke; all possible events were audited independently by 3 physicians.                                                                                                  |
| Windham 2015 <sup>13</sup>   | evidence of sudden or rapid onset of neurologic symptoms that persisted for more than 24 hours or led to death with no other apparent cause, such as trauma, tumor, infection, or anticoagulation                                                                                                                       | any one of the following criteria: CT or MRI with intraparenchymal hematoma; demonstration at autopsy or surgery; or at least 1 major or 2 minor neurologic deficits, bloody spinal fluid on lumbar puncture, no CT or MRI with or without cerebral angiography demonstrating an avascular mass effect, and no evidence of aneurysm or arteriovenous malformation | annual follow-up interviews and community surveillance, including medical record reviews; cases were reviewed separately using a computerized algorithm and a physician reviewer                                                                                                                                                                  |

CT = computed tomography; MRI = magnetic resonance imaging

Supplemental Table V: Silent Brain Infarction MRI Test Results and Stroke Outcomes

| Study Number | Study First Author and Year                             | Mean Follow-Up (Mo) | Number of Subjects with MRI evidence of SBI at baseline | Number of Subjects without MRI evidence of SBI at baseline | All Strokes in SBI Positive Test Group | Ischemic Strokes in SBI Group | Hemorrhagic Strokes in SBI Group | Unknown or Unclassified Stroke Subtype in SBI Group | All Strokes in no SBI Group | Ischemic Strokes in no SBI Group | Hemorrhagic Strokes in no SBI Group | Unknown or Unclassified Stroke Subtype in no SBI Group | Adjusted All Stroke risk metric | Adjustments for which covariates                                                                                                                                                                                                                                           | Magnitude of Adjusted All Stroke Risk Metric (HR or OR) in presence of SBI at baseline | Adjusted All Stroke 95% CI | Adjusted All Stroke p-value |
|--------------|---------------------------------------------------------|---------------------|---------------------------------------------------------|------------------------------------------------------------|----------------------------------------|-------------------------------|----------------------------------|-----------------------------------------------------|-----------------------------|----------------------------------|-------------------------------------|--------------------------------------------------------|---------------------------------|----------------------------------------------------------------------------------------------------------------------------------------------------------------------------------------------------------------------------------------------------------------------------|----------------------------------------------------------------------------------------|----------------------------|-----------------------------|
| 1            | Bemick 2001 <sup>1</sup>                                | 50.4                | 923                                                     | 2401                                                       | 67                                     | 57                            | 10                               |                                                     | 92                          | 74                               | 13                                  | 5                                                      | HR                              | age, sex, systolic blood pressure, diastolic blood pressure, atrial fibrillation, left ventricular hypertrophy, fasting insulin, common carotid artery wall thickness, myocardial infarction history                                                                       | 1.52                                                                                   | 1.10-2.10                  | 0.051                       |
| 2            | Kario 2001 <sup>2</sup>                                 | 42                  | 282                                                     | 303                                                        | 38                                     | not available                 | not available                    |                                                     | 7                           | not available                    | not available                       |                                                        | RR                              | not specified, adjusted relative risks and 95% CI were calculated using Cox regression analysis                                                                                                                                                                            | 4.63                                                                                   | 2.04-10.5                  | 0.003                       |
| 3            | Naganuma 2005 <sup>3</sup>                              | 40.2                | 59                                                      | 60                                                         | 10                                     | 6                             | 4                                |                                                     | 0                           | 0                                | 0                                   |                                                        | HR                              | not specified, adjusted HR obtained with a multivariate Cox proportional hazards taking into account 11 clinical variables                                                                                                                                                 | 7.33                                                                                   | 1.27-42.25                 | 0.026                       |
| 4            | Bokura 2006 <sup>4</sup>                                | 75.6                | 380                                                     | 2304                                                       | 48                                     | 32                            | 15                               | 1                                                   | 43                          | 24                               | 17                                  | 2                                                      | OR                              | age, sex hypertension, diabetes mellitus, dyslipidemia, smoking, alcohol use, family history of stroke                                                                                                                                                                     | 3.66                                                                                   | 2.28-5.89                  | <0.0001                     |
| 5            | Debette 2010 <sup>5</sup>                               | 110.4*              | 224*                                                    | 1862*                                                      | 16*                                    | 15*                           | not available                    |                                                     | 51                          | 42                               | not available                       |                                                        | HR                              | age, sex, systolic blood pressure, current smoking, diabetes, history of cerebrovascular disease                                                                                                                                                                           | 2.3*                                                                                   | 1.30-4.06*                 | 0.004*                      |
| 6            | Putala 2011 <sup>6</sup>                                | 104.4               | 86                                                      | 569                                                        | 19*                                    | 18                            | 1*                               |                                                     | 62*                         | 54                               | 8*                                  |                                                        | HR*                             | age, sex, hypertension, history of transient ischemic attack, diabetes, stroke etiology, silent brain infarcts, and leukoaraiosis                                                                                                                                          | 1.62*                                                                                  | 0.93-2.82*                 | 0.087*                      |
| 7            | Umemura 2011 <sup>7</sup>                               | 72                  | 46                                                      | 144                                                        | 7*                                     | 6*                            | 1                                |                                                     | 6*                          | 6*                               | 0*                                  |                                                        | not provided                    | not applicable                                                                                                                                                                                                                                                             | not applicable                                                                         | not applicable             | not applicable              |
| 8            | Gioia 2012 <sup>8</sup>                                 | 25.7                | 48                                                      | 122                                                        | 11                                     | 11                            | 0                                |                                                     | 8                           | 8                                | 0                                   |                                                        | HR                              | age, sex, hypertension, diabetes, dyslipidemia, coronary artery disease, tobacco use, alcohol use, and chronic renal failure                                                                                                                                               | 3.2                                                                                    | 1.2-8.7                    | 0.02                        |
| 9            | Poels 2012 <sup>9</sup>                                 | 120                 | 210                                                     | 797                                                        | 42                                     | 25*                           | 5*                               | 12*                                                 | 57                          | 34*                              | 7*                                  | 16*                                                    | HR                              | age, sex, smoking, systolic blood pressure, antihypertensive treatment, systolic blood pressure X antihypertensive treatment, diabetes, atrial fibrillation, left ventricular hypertrophy, and coronary heart disease                                                      | 2.5                                                                                    | 1.7-3.9                    | not provided                |
| 10           | Weber 2012 <sup>10</sup>                                | 30                  | 207                                                     | 207                                                        | 27                                     | 24                            | 3                                |                                                     | 19                          | 17                               | 2                                   |                                                        | OR                              | patients with and without SBI were matched on age and sex                                                                                                                                                                                                                  | 1.42                                                                                   | 0.79-2.56                  | 0.24                        |
| 11           | Di Tullio 2013 (Northern Manhattan Study) <sup>11</sup> | 85.2                | 192*                                                    | 1043*                                                      | 22*                                    | not available                 | not available                    |                                                     | 49*                         | not available                    | not available                       |                                                        | HR                              | age, sex, race-ethnicity, education, medical insurance status, body mass index, smoking, physical activity, moderate alcohol drinking, hypertension, diabetes, hypercholesterolemia, history of atrial fibrillation, coronary artery disease, and myocardial infarction    | 1.9                                                                                    | 1.1-3.3                    | 0.014                       |
| 12           | Miwa 2013 <sup>12</sup>                                 | 57.6                | 130*                                                    | 334*                                                       | 12*                                    | 9*                            | 3*                               |                                                     | 9*                          | 7*                               | 2*                                  |                                                        | not provided                    | not applicable                                                                                                                                                                                                                                                             | not applicable                                                                         | not applicable             | not applicable              |
| 13           | Windham 2015 <sup>13</sup>                              | 174                 | 220                                                     | 1611                                                       | 40                                     | not available                 | not available                    |                                                     | 95                          | not available                    | not available                       |                                                        | HR                              | age, sex, race-center, education level, body mass index, smoking, alcohol use, diabetes, systolic and diastolic blood pressures, antihypertensive medication use, heart disease, statin use, high- and low-density lipoprotein cholesterol levels, and triglyceride level. | 2.54                                                                                   | 1.70-3.79                  | <.001                       |

\*data obtained via direct correspondence with study authors

MRI = magnetic resonance imaging; SBI = silent brain infarction; CI = confidence interval; HR = hazard ratio; OR = odds ratio;



Supplemental Table VI: Results of Risk of Bias Questions to Assess the Quality of Included Studies

| Type of Bias:                | Selection                                                                                                         |                                                                 |                                                                                                   | Detection                            |                                                                                                 |                                                                |                                                                            | Misclassification                                                                                         | Reporting                                                  | Attrition                                                      | Confounding                                                                             |
|------------------------------|-------------------------------------------------------------------------------------------------------------------|-----------------------------------------------------------------|---------------------------------------------------------------------------------------------------|--------------------------------------|-------------------------------------------------------------------------------------------------|----------------------------------------------------------------|----------------------------------------------------------------------------|-----------------------------------------------------------------------------------------------------------|------------------------------------------------------------|----------------------------------------------------------------|-----------------------------------------------------------------------------------------|
| Question:                    | Was the study sample randomly selected or a community-dwelling population to minimize the risk of selection bias? | Were the inclusion and exclusion criteria adequately described? | Was the study's primary objective to assess whether SBI is predictive of clinically overt stroke? | Was the study prospective in nature? | Were the investigators blinded to the clinical history of patients during ascertainment of SBI? | Did more than one investigator assess for the presence of SBI? | Were investigators blinded to SBI status when determining stroke outcomes? | Did the investigators describe a method by which SBI was differentiated from dilated perivascular spaces? | Did more than one investigator assess for stroke outcomes? | Were losses to follow up systematically recorded and reported? | Were data adjusted for covariate risk factors to minimize the risk of confounding bias? |
| Answer:                      | Yes (+) or no (-)                                                                                                 | Yes (+) or no (-)                                               | Yes (+) or no (-)                                                                                 | Yes (+) or no (-)                    | Yes (+) or no (-)                                                                               | Yes (+) or no (-)                                              | Yes (+) or no (-)                                                          | Yes (+) or no (-)                                                                                         | Yes (+) or no (-)*                                         | Yes (+) or no (-)                                              | Yes (+) or no (-)*                                                                      |
| Bernick 2001 <sup>1</sup>    | +                                                                                                                 | +                                                               | +                                                                                                 | +                                    | +                                                                                               | +                                                              | +                                                                          | +                                                                                                         | +                                                          | -                                                              | +                                                                                       |
| Kario 2001 <sup>2</sup>      | -                                                                                                                 | +                                                               | -                                                                                                 | +                                    | +                                                                                               | +                                                              | -                                                                          | -                                                                                                         | +                                                          | +                                                              | +                                                                                       |
| Naganuma 2005 <sup>3</sup>   | -                                                                                                                 | +                                                               | +                                                                                                 | +                                    | +                                                                                               | +                                                              | -                                                                          | -                                                                                                         | +                                                          | +                                                              | +                                                                                       |
| Bokura 2006 <sup>4</sup>     | -                                                                                                                 | -                                                               | +                                                                                                 | +                                    | -                                                                                               | +                                                              | -                                                                          | +                                                                                                         | -                                                          | +                                                              | +                                                                                       |
| Debette 2010 <sup>5</sup>    | +                                                                                                                 | +                                                               | +                                                                                                 | +                                    | +                                                                                               | +                                                              | +                                                                          | +                                                                                                         | +                                                          | -                                                              | +                                                                                       |
| Putala 2011 <sup>6</sup>     | -                                                                                                                 | +                                                               | +                                                                                                 | +                                    | -                                                                                               | +                                                              | +                                                                          | +                                                                                                         | +                                                          | +                                                              | +                                                                                       |
| Umemura 2011 <sup>7</sup>    | -                                                                                                                 | +                                                               | -                                                                                                 | +                                    | +                                                                                               | +                                                              | -                                                                          | +                                                                                                         | -                                                          | +                                                              | -                                                                                       |
| Gioia 2012 <sup>8</sup>      | -                                                                                                                 | +                                                               | +                                                                                                 | -                                    | +                                                                                               | +                                                              | +                                                                          | +                                                                                                         | -                                                          | +                                                              | +                                                                                       |
| Poels 2012 <sup>9</sup>      | +                                                                                                                 | +                                                               | +                                                                                                 | +                                    | +                                                                                               | +                                                              | -                                                                          | +                                                                                                         | +                                                          | +                                                              | +                                                                                       |
| Weber 2012 <sup>10</sup>     | -                                                                                                                 | +                                                               | -                                                                                                 | +                                    | +                                                                                               | +                                                              | +                                                                          | +                                                                                                         | +                                                          | +                                                              | +                                                                                       |
| Di Tullio 2013 <sup>11</sup> | +                                                                                                                 | +                                                               | -                                                                                                 | +                                    | +                                                                                               | +                                                              | +                                                                          | +                                                                                                         | +                                                          | +                                                              | +                                                                                       |
| Miwa 2013 <sup>12</sup>      | -                                                                                                                 | -                                                               | -                                                                                                 | +                                    | +                                                                                               | +                                                              | -                                                                          | +                                                                                                         | +                                                          | -                                                              | -                                                                                       |
| Windham 2015 <sup>13</sup>   | +                                                                                                                 | +                                                               | +                                                                                                 | +                                    | +                                                                                               | +                                                              | -                                                                          | +                                                                                                         | +                                                          | +                                                              | +                                                                                       |

\*Minimal (+) if studies controlled for 4 of the following 6 potential stroke risk factors which are potential confounders: age, sex, hypertension, diabetes mellitus, coronary artery disease, and smoking history and hyperlipidemia by including these variables in the multivariate model or by ensuring that patients with and without SBI were similar or matched on these variables. Relatively higher risk (-) if studies did not provide adjusted risk metric demonstrating strength of association between SBI and incident stroke.

Supplemental Figure I. Study selection flow diagram.

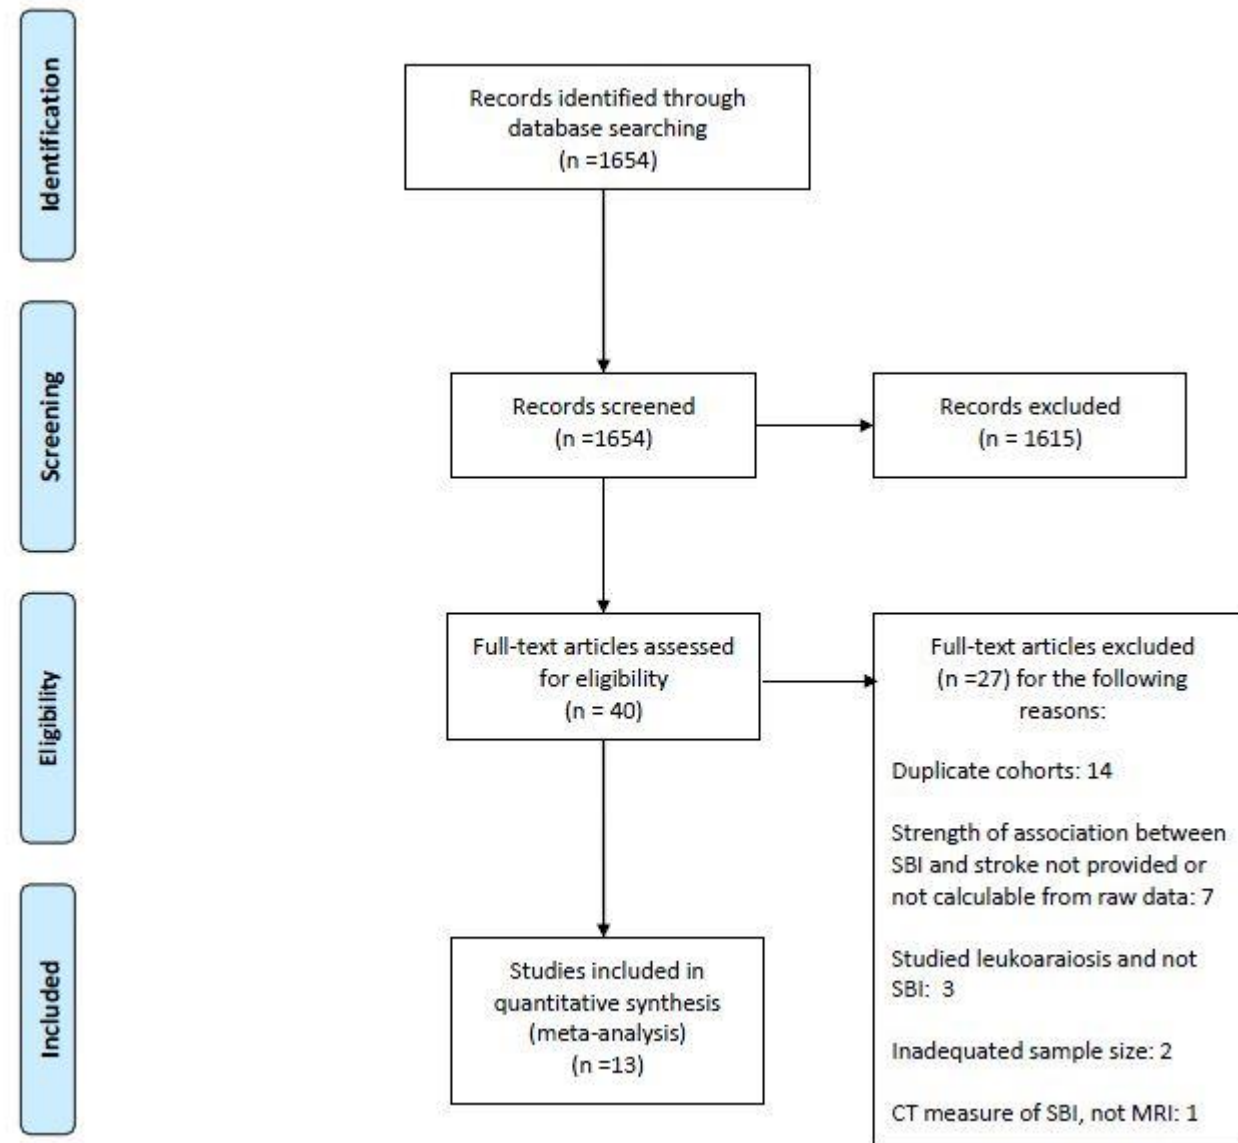

SBI = silent brain infarction

## Supplemental References

1. Bernick C, Kuller L, Dulberg C, Longstreth Jr WT, Manolio T, Beauchamp N, et al. Silent mri infarcts and the risk of future stroke: The cardiovascular health study. *Neurology*. 2001;57:1222-1229
2. Kario K, Shimada K, Schwartz JE, Matsuo T, Hoshida S, Pickering TG. Silent and clinically overt stroke in older japanese subjects with white-coat and sustained hypertension. *Journal of the American College of Cardiology*. 2001;38:238-245
3. Naganuma T, Uchida J, Tsuchida K, Takemoto Y, Tatsumi S, Sugimura K, et al. Silent cerebral infarction predicts vascular events in hemodialysis patients. *Kidney international*. 2005;67:2434-2439
4. Bokura H, Kobayashi S, Yamaguchi S, Iijima K, Nagai A, Toyoda G, et al. Silent brain infarction and subcortical white matter lesions increase the risk of stroke and mortality: A prospective cohort study. *J Stroke Cerebrovasc Dis*. 2006;15:57-63
5. Debette S, Beiser A, DeCarli C, Au R, Himali JJ, Kelly-Hayes M, et al. Association of mri markers of vascular brain injury with incident stroke, mild cognitive impairment, dementia, and mortality: The framingham offspring study. *Stroke; a journal of cerebral circulation*. 2010;41:600-606
6. Putaala J, Haapaniemi E, Kurkinen M, Salonen O, Kaste M, Tatlisumak T. Silent brain infarcts, leukoaraiosis, and long-term prognosis in young ischemic stroke patients. *Neurology*. 2011;76:1742-1749
7. Umemura T, Kawamura T, Umegaki H, Mashita S, Kanai A, Sakakibara T, et al. Endothelial and inflammatory markers in relation to progression of ischaemic cerebral small-vessel disease and cognitive impairment: A 6-year longitudinal study in patients with type 2 diabetes mellitus. *J Neurol Neurosurg Psychiatry*. 2011;82:1186-1194
8. Gioia LC, Tollard E, Dubuc V, Lanthier S, Deschaintre Y, Chagnon M, et al. Silent ischemic lesions in young adults with first stroke are associated with recurrent stroke. *Neurology*. 2012;79:1208-1214
9. Poels MM, Steyerberg EW, Wieberdink RG, Hofman A, Koudstaal PJ, Ikram MA, et al. Assessment of cerebral small vessel disease predicts individual stroke risk. *J Neurol Neurosurg Psychiatry*. 2012;83:1174-1179
10. Weber R, Weimar C, Wanke I, Möller-Hartmann C, Gizewski ER, Blatchford J, et al. Risk of recurrent stroke in patients with silent brain infarction in the prevention regimen for effectively avoiding second strokes (profess) imaging substudy. *Stroke; a journal of cerebral circulation*. 2012;43:350-355
11. Di Tullio MR, Jin Z, Russo C, Elkind MS, Rundek T, Yoshita M, et al. Patent foramen ovale, subclinical cerebrovascular disease, and ischemic stroke in a population-based cohort. *Journal of the American College of Cardiology*. 2013;62:35-41
12. Miwa K, Tanaka M, Okazaki S, Furukado S, Sakaguchi M, Mochizuki H, et al. Association between interleukin-6 levels and first-ever cerebrovascular events in patients with vascular risk factors. *Arterioscler Thromb Vasc Biol*. 2013;33:400-405
13. Windham BG, Deere B, Griswold ME, Wang W, Bezerra DC, Shibata D, et al. Small brain lesions and incident stroke and mortality: A cohort study. *Ann Intern Med*. 2015;163:22-31
