# Supplementary material
Source: PubMed Central journal article supplement (PMC4766016)
Supplement: NIHMS750030-supplement-Related_Manuscript_File_2.pdf [file NIHMS750030-supplement-Related_Manuscript_File_2.pdf]

## Ajay Gupta

---

**From:** Toshitaka Umemura <t.umemura@bg7.so-net.ne.jp>  
**Sent:** Friday, July 10, 2015 10:09 AM  
**To:** Ajay Gupta  
**Subject:** Re: Umemura et al JNNP 2011

Dear Dr. Gupta,

I will permit you to add my name to the Acknowledgement section given my sharing of unpublished data. Thank you for your contact.

Best regards,

Toshitaka

**From:** [Ajay Gupta](#)  
**Sent:** Thursday, July 9, 2015 7:05 AM  
**To:** [Toshitaka Umemura](#)  
**Subject:** RE: Umemura et al JNNP 2011

Dear Dr. Umemura,

I am preparing our SBI meta-analysis manuscript for publication. We are acknowledging study authors like you in our acknowledgements section. Do I have your permission to add your name to the acknowledgement section given your sharing of unpublished data?

Best regards,

Ajay

---

**From:** Toshitaka Umemura [mailto:t.umemura@bg7.so-net.ne.jp]  
**Sent:** Friday, April 10, 2015 1:10 PM  
**To:** Ajay Gupta  
**Subject:** Re: Umemura et al JNNP 2011

Dear Dr. Gupta,

Thank you for your interest in our paper.

During the 6-year follow-up, 17 patients had suffered stroke or myocardial infarction. For more information on vascular events are shown in attached Table. Vascular events occurred more than from SBI progression group.

Sincerely,

Toshitaka Umemura, MD, PhD

Director  
Department of Neurology  
Chubu Rosai Hospital  
1-10-6 Komei, Minato-ku, Nagoya City, Aichi 455-8530, Japan  
Tel: +81-052-652-5511  
Fax: +81-052-653-3533  
E-mail: [t.umemura@bg7.so-net.ne.jp](mailto:t.umemura@bg7.so-net.ne.jp)

**From:** [Ajay Gupta](#)  
**Sent:** Thursday, April 9, 2015 3:26 AM  
**To:** [t.umemura@bg7.so-net.ne.jp](mailto:t.umemura@bg7.so-net.ne.jp)  
**Subject:** Umemura et al JNNP 2011

Dear Dr. Umemura,

I have read with great interest your attached paper, "Endothelial and inflammatory markers in relation to progression of ischaemic cerebral small-vessel disease and cognitive impairment: a 6-year longitudinal study in patients with type 2 diabetes mellitus."

I am a neuroradiologist conducting a meta-analysis on the extent to which silent brain infarction on MRI predicts clinical stroke. In your paper, of your 190 subjects, 46 had SBI on study entry.

I would like to cite and include your study in our meta-analysis. However, I would need to know how many clinical strokes occurred during follow-up in the 46 subjects with SBI on baseline versus how many strokes occurred in the 144 subjects without SBI on MRI at baseline? I know that patients with stroke were excluded from your study, and thus the breakdown of stroke in the SBI+ versus SBI- groups is not central to your paper, but of great interest to me.

Let me know if this data is available and if you would be willing to share this so that I can pool your important study with the other studies in our meta-analysis.

Best regards,

Ajay Gupta, MD  
Assistant Professor of Radiology and Neuroscience  
Neuroradiology Fellowship Director  
Department of Radiology  
Brain and Mind Research Institute  
Weill Cornell Medical College  
NewYork-Presbyterian Hospital  
525 East 68th Street, New York, NY 10065  
(tel) 212-746-0578  
(fax) 212-746-8597
